# Supplementary material for: Structural Elements Recognized by Abacavir-Induced T Cells
Source: MDPI journal article supplement (doi:10.3390/ijms18071464), 2017-07-07
Supplement: s1 [file s1]

## JRT3-CD8/2D

Ctrl  
CD69+: 2.05%

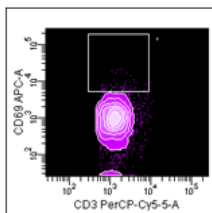

Abacavir 10  $\mu$ g/ml  
CD69+: 72.01%

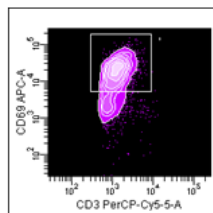

SPT5a 976 20  $\mu$ g/ml  
CD69+: 1.95

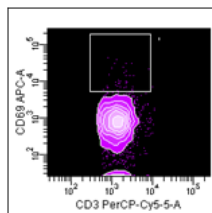

HIV 153 20  $\mu$ g/ml  
CD69+: 2.45%

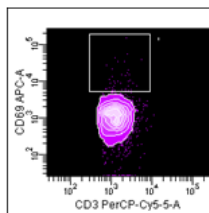

HSV1/2 230 20  $\mu$ g/ml  
CD69+: 2.54%

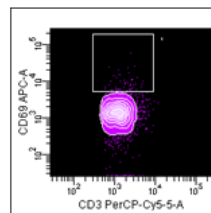

## JRT3-CD8/UL3L

Ctrl  
CD69+: 1.11%

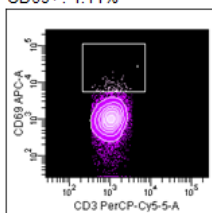

Abacavir 10  $\mu$ g/ml  
CD69+: 28.85%

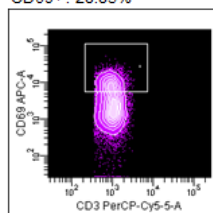

SPT5a 976 20  $\mu$ g/ml  
CD69+: 0.97

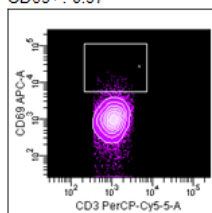

HIV 153 20  $\mu$ g/ml  
CD69+: 0.63%

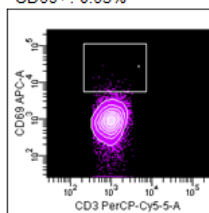

HSV1/2 230 20  $\mu$ g/ml  
CD69+: 0.42%

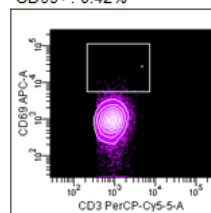

JRT3-CD8 cells expressing TCR 2D (upper panel) and TCR UL3L (lower panel) were stimulated with abacavir or with peptides in the presence of 721.221 cells expressing HLA-b\*57:01. After 16 hours of incubation, activation was monitored by CD69 upregulation using flow cytometry. JRT3-CD8 cells expressing TCR 2D or UL3L could be activated by abacavir but not by the tested peptides. Percentages indicate the proportion of events expressing CD69.
